# Supplementary material for: Cardiovascular Screening Practices and Statin Prescription Habits in Patients with Psoriasis among Dermatologists, Rheumatologists and Primary Care Physicians
Source: PubMed Central journal article supplement — Acta Derm Venereol. 2023 Mar 28;103:5087. doi: 10.2340/actadv.v103.5087 (PMC10077140; doi:10.2340/actadv.v103.5087), 2023-03-28
Supplement: ActaDV-103-5087-s1.pdf [file ActaDV-103-5087-s1.pdf]

Supplementary material has been published as submitted. It has not been copyedited, typeset or checked for scientific content by Acta Dermato-Venereologica

**Table SI. Baseline screening recommendation and their periodicity.**

| <b>Risk factor</b>                     | <b>Baseline screening</b>                                                                                                                                                                                                                                                                                              | <b>Periodicity</b>                                                                                                                                                                                                                                                                                                                                                                               |
|----------------------------------------|------------------------------------------------------------------------------------------------------------------------------------------------------------------------------------------------------------------------------------------------------------------------------------------------------------------------|--------------------------------------------------------------------------------------------------------------------------------------------------------------------------------------------------------------------------------------------------------------------------------------------------------------------------------------------------------------------------------------------------|
| <b>Tobacco use</b>                     | All adults should be inquired about tobacco consumption <sup>21-24</sup>                                                                                                                                                                                                                                               | <ul style="list-style-type: none"> <li>At every healthcare visit <sup>23,24</sup></li> </ul>                                                                                                                                                                                                                                                                                                     |
| <b>Obesity</b>                         | BMI calculation and waist circumference measurement <sup>21-24</sup>                                                                                                                                                                                                                                                   | <ul style="list-style-type: none"> <li>At least annually <sup>23</sup></li> </ul>                                                                                                                                                                                                                                                                                                                |
| <b>HTN</b>                             | Blood pressure measurement in all adults (18 years or older) <sup>25,26</sup>                                                                                                                                                                                                                                          | <ul style="list-style-type: none"> <li>If &lt;120/80, every 5 years <sup>25,26</sup></li> <li>If 120-130/80-85, every 3 years <sup>25,26</sup></li> <li>If &gt;130/85, at least annually <sup>25,26</sup></li> </ul>                                                                                                                                                                             |
| <b>Dyslipidemia</b>                    | Fasting or nonfasting lipid profile <sup>23,24,29</sup> <ul style="list-style-type: none"> <li>Men &gt; 40 years old and women &gt; 50 years of age or post-menopausal <sup>27</sup></li> <li>Adults who are 20 years of age or older and not on lipid-lowering therapy <sup>28</sup></li> </ul>                       | <ul style="list-style-type: none"> <li>Interval for subsequent screening not provided <sup>24,27</sup></li> <li>Adults 20 to 39 years of age, at least every 4-6 years; For adults 40 to 75 years of age, assess traditional CVRFs routinely <sup>23</sup></li> <li>Annual screening in middle-aged adults without CVRFs (men aged 45-65 years, women aged 55-65 years) <sup>29</sup></li> </ul> |
| <b>DM</b>                              | Fasting plasma glucose, HbA1c <sup>22,30</sup> <ul style="list-style-type: none"> <li>Testing should begin at 45 years <sup>30</sup></li> </ul>                                                                                                                                                                        | <ul style="list-style-type: none"> <li>If results are normal, testing should be repeated at least every 3 years <sup>30</sup></li> </ul>                                                                                                                                                                                                                                                         |
| <b>10-year risk of CVD calculation</b> | <ul style="list-style-type: none"> <li>SCORE2 in apparent healthy men &gt; 40 years old and in women &gt; 50 years of age or post-menopausal; SCORE2-OP in apparent healthy people <math>\geq</math> 70 years <sup>24</sup></li> <li>Pooled cohort equations for adults 40 to 75 years of age <sup>23</sup></li> </ul> | <ul style="list-style-type: none"> <li>Every 4 to 6 years <sup>23,24</sup></li> </ul>                                                                                                                                                                                                                                                                                                            |

The clinical practice guideline on which each recommendation is based is mentioned in superscript at the end of each statement. BMI: Body Mass Index; CVD: Cardiovascular disease; CVRF: Cardiovascular risk factors; DM: Diabetes mellitus; ESC: European Society of Cardiology; HTN: Hypertension; \*\* In the survey question, considering the questionnaire was distributed in a European country, the discrepancy in the age at screening beginning was resolved in favor of ESC guidelines.

**Table SII. Baseline characteristics of the dermatologists surveyed and AEDV members**

|                             | <b>Dermatologists surveyed</b> | <b>AEDV members</b> |
|-----------------------------|--------------------------------|---------------------|
| <b>Female, %</b>            | 63.1                           | 48.3                |
| <b>Fellows, %</b>           | 8.7                            | 12.0                |
| <b>Private activity*, %</b> | 58.3                           | 82.2                |

AEDV: Spanish Society of Dermatology and Venereology (Academia Española de Dermatología y Venereología). \*With or without public activity.

**Table SIII. Baseline characteristics of the rheumatologists surveyed and SER members**

|                             | <b>Rheumatologists surveyed</b> | <b>Rheumatologists from the SER</b> |
|-----------------------------|---------------------------------|-------------------------------------|
| <b>Female, %</b>            | 67.0                            | 61.0                                |
| <b>Fellows, %</b>           | 3.2                             | 15.9                                |
| <b>Private activity*, %</b> | 22.3                            | 29.4                                |

SER: Spanish Society of Rheumatology (Sociedad Española de Reumatología). \*With or without public activity.

**Table SIV. Statin prescription multivariable analysis**

|                                                         | Univariable |            |                  | Multivariable |             |                  |
|---------------------------------------------------------|-------------|------------|------------------|---------------|-------------|------------------|
|                                                         | OR          | 95% CI     | p-value          | OR            | 95% CI      | p-value          |
| <b>Specialty</b>                                        |             |            |                  |               |             |                  |
| Dermatologists vs Rheumatologists                       | 0.24        | 0.12-0.50  | <b>&lt;0.001</b> | 0.04          | 0.01-0.16   | <b>&lt;0.001</b> |
| <b>Sex</b>                                              |             |            |                  |               |             |                  |
| Men vs women                                            | 1.08        | 0.54-2.16  | 0.82             | —             | —           | —                |
| <b>Practice setting</b>                                 |             |            | 0.702            |               |             | —                |
| Private vs Public                                       | 0.81        | 0.30-2.20  | 0.678            | —             | —           | —                |
| Private + public vs only public                         | 0.73        | 0.33-1.59  | 0.420            | —             | —           | —                |
| <b>Years since completing residency training</b>        |             |            | 0.012            |               |             | 0.003            |
| 1-10 years vs resident                                  | 2.20        | 0.25-19.24 | 0.476            | 1.82          | 0.11-29.90  | 0.674            |
| 10-20 years vs resident                                 | 3.88        | 0.45-33.34 | 0.216            | 1.98          | 0.12-31.89  | 0.629            |
| 20-30 years vs resident                                 | 2.48        | 0.28-21.70 | 0.413            | 1.49          | 0.08-26.46  | 0.785            |
| >30 years vs resident                                   | 9.78        | 1.13-84.37 | <b>0.038</b>     | 13.45         | 0.80-226.62 | 0.071            |
| <b>Patients with psoriasis treated per month</b>        |             |            | 0.369            |               |             | 0.433            |
| 5-20 vs <5                                              | 1.10        | 0.21-5.57  | 0.920            | 0.44          | 0.04-4.88   | 0.500            |
| >20 vs <5                                               | 1.75        | 0.36-8.59  | 0.489            | 0.80          | 0.07-9.21   | 0.859            |
| <b>Specialized psoriasis outpatient clinic</b>          |             |            |                  | —             | —           | —                |
| No                                                      | —           | —          |                  | —             | —           | —                |
| Yes                                                     | 1.76        | 0.86-3.59  | 0.122            | 7.93          | 2.06-30.59  | <b>0.003</b>     |
| <b>Research projects related to psoriasis</b>           |             |            |                  |               |             |                  |
| No                                                      | —           | —          |                  | —             | —           |                  |
| Yes                                                     | 1.62        | 0.84-3.12  | 0.151            | 1.28          | 0.50-3.31   | 0.609            |
| <b>University teaching including psoriasis lectures</b> |             |            |                  |               |             |                  |
| No                                                      | —           | —          |                  | —             | —           |                  |
| Yes                                                     | 3.13        | 1.51-6.48  | <b>0.002</b>     | 2.85          | 1.05-7.75   | <b>0.041</b>     |

CI: Confidence interval; OR: Odds Ratio.
