# Supplementary material for: Cardiovascular Screening Practices and Statin Prescription Habits in Patients with Psoriasis among Dermatologists, Rheumatologists and Primary Care Physicians
Source: PubMed Central journal article supplement — Acta Derm Venereol. 2023 Mar 28;103:5087. doi: 10.2340/actadv.v103.5087 (PMC10077140; doi:10.2340/actadv.v103.5087), 2023-03-28
Supplement: ActaDV-103-5087-s2.pdf [file ActaDV-103-5087-s2.pdf]

Supplementary material has been published as submitted. It has not been copyedited, typeset or checked for scientific content by Acta Dermato-Venereologica

## APPENDIX S1

### Dermatologists and Rheumatologists questionnaire

**1. What is your gender?**

- Male     Female

**2. Which of the following best describes your practice setting?**

- Dermatologist/Rheumatologists in a public hospital  
 Dermatologist/Rheumatologist in a private clinic/hospital  
 Both

**3. How many years have passed since you completed your residency?**

- Currently a resident  
 1-10 years  
 11-20 years  
 21-30 years  
 >30 years

**4. About how many patients with psoriasis and/or psoriatic arthritis do you provide care for PER MONTH?**

- < 5  
 5-10  
 11-15  
 16-20  
 21-25  
 > 25

**5. Indicate if you work or actively participate in any of these fields (you can choose more than one option):**

- Psoriasis monographic consult  
 University teaching, including psoriasis lessons  
 Research projects related to psoriasis  
 None of the above

**6. Do you screen your psoriasis patients for tobacco use?**

- Yes  
 No

**7. Do you screen your patients with psoriasis for obesity (obtaining BMI) at least once a year?**

- Yes

No

**8. Do you measure blood pressure of your patients with psoriasis aged 18 or over at least every 3-5 years?**

Yes

No

**9. Do you perform annual screening for dyslipidemia in your patients with psoriasis from the age of 40 in men and from the age of 50 in women?**

Yes

No

**10. Do you perform screening for type 2 DM in your patients with psoriasis over 45 years of age at least once every 3 years?**

Yes

No

**11. Do you calculate the 10-year risk of CVD (SCORE Risk Charts or the Pooled Cohort ASCVD Risk Equation) of your patients with psoriasis from the age of 40, at least every 5 years?**

Yes

No

**12. If you do NOT screen your patients with psoriasis for cardiovascular risk factors, what is the reason? (You can choose more than one)**

I did not know the association between psoriasis and increased cardiovascular risk

I was not aware of the screening recommendations in these patients

Lack of time

Lack of facilities or testing equipment

Other (free text): \_\_\_\_\_

**13. If you do NOT screen your patients with psoriasis for cardiovascular risk factors, do you refer them to another specialist?**

Yes

No

**14. In case you perform screening, which factors, if any, stimulate you to screen psoriasis patients for cardiovascular risk factors? (You can choose more than one)**

Psoriasis severity

Patient's history for additional increased cardiovascular risk (diet, smoking, sedentary lifestyle, family history and/or obesity)

I screen all of my psoriasis patients for cardiovascular risk factors, regardless of any of the factors above.

I do not screen any of my psoriasis patients for cardiovascular risk factors.

**15. Do you routinely prescribe statins to your psoriasis patients who have an indication according to clinical practice guidelines?**

Yes

No

**16. If your previous answer was no, would you be willing to start prescribing statins after receiving specific training?**

No. I consider that it would exceed the role of a dermatologist/rheumatologists

No. I do not have enough time to assess cardiovascular risk and statin indication in my patients

No. I do not have facilities or equipment to assess cardiovascular risk and statin indication in my patients

Yes. I would start prescribing them after attending training courses aimed at dermatologists/rheumatologists

Yes. Please, indicate in the free text what make you start prescribing statins \_\_\_\_\_

Primary Care Physicians Questionnaire

**1. What is your gender?**

Male     Female

**2. Which of the following best describes your practice setting?**

Primary care physician in a public hospital or outpatient clinic

Primary care physician in a private clinic/hospital

Both

**3. How many years have passed since you completed your residency?**

Currently a resident

1-10 years

11-20 years

21-30 years

>30 years

**4. About how many patients with psoriasis and/or psoriatic arthritis do you provide care for PER MONTH?**

< 5

5-10

11-15

16-20

21-25

> 25

**5. Indicate if you work or actively participate in any of these fields (you can choose more than one option):**

- Psoriasis monographic consult
- University teaching, including psoriasis lessons
- Research projects related to psoriasis
- None of the above

**6. Do you screen your psoriasis patients for tobacco use?**

- Yes
- No

**7. Do you screen your patients with psoriasis for obesity (obtaining BMI) at least once a year?**

- Yes
- No

**8. Do you measure blood pressure of your patients with psoriasis aged 18 or over at least every 3-5 years?**

- Yes
- No

**9. Do you perform annual screening for dyslipidemia in your patients with psoriasis from the age of 40 in men and from the age of 50 in women?**

- Yes
- No

**10. Do you perform screening for type 2 DM in your patients with psoriasis over 45 years of age at least once every 3 years?**

- Yes
- No

**11. Do you calculate the 10-year risk of CVD (SCORE Risk Charts or the Pooled Cohort ASCVD Risk Equation) of your patients with psoriasis from the age of 40, at least every 5 years?**

- Yes
- No

**12. If you do NOT screen your patients with psoriasis for cardiovascular risk factors, what is the reason? (You can choose more than one)**

- I did not know the association between psoriasis and increased cardiovascular risk
- I was not aware of the screening recommendations in these patients
- Lack of time
- Lack of facilities or testing equipment
- Other (free text): \_\_\_\_\_

**13. In case you perform screening, which factors, if any, stimulate you to screen psoriasis patients for cardiovascular risk factors? (You can choose more than one)**

- Psoriasis severity
- Patient's history for additional increased cardiovascular risk (diet, smoking, sedentary lifestyle, family history and/or obesity)
- I screen all of my psoriasis patients for cardiovascular risk factors, regardless of any of the factors above.
- I do not screen any of my psoriasis patients for cardiovascular risk factors.

**14. Do you consider the presence of psoriasis as a risk-enhancing factor when deciding whether to prescribe statins in your patients?**

- Yes
- No
